# Supplementary material for: Development of Protein- and Fiber-Enriched, Sugar-Free Lentil Cookies: Impact of Whey Protein, Inulin, and Xylitol on Physical, Textural, and Sensory Characteristics
Source: MDPI journal article supplement (doi:10.3390/foods11233819), 2022-11-26
Supplement: s1 [file s1]

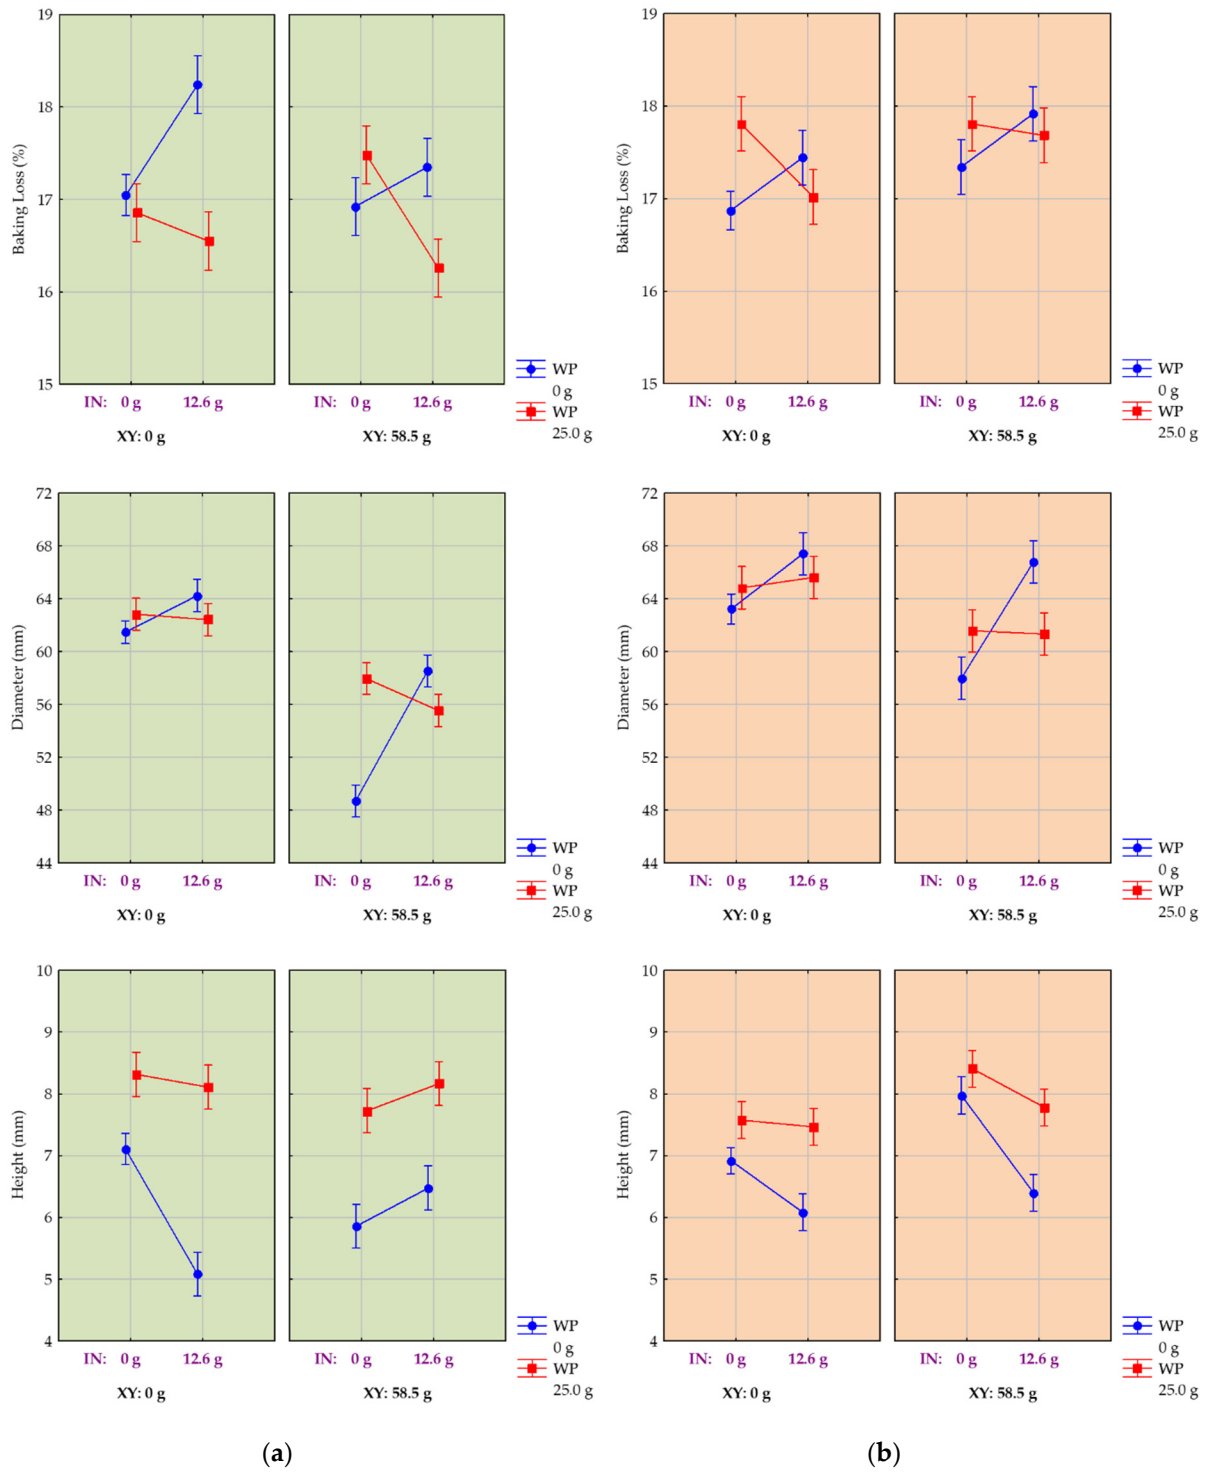

**Figure S1.** Interaction plots for the baking loss, diameter and height of (a) green-lentil- and (b) red-lentil-based cookies. Data markers represent means. Vertical bars denote 95% confidence intervals (n=12). XY: xylitol, IN: inulin, WP: whey protein isolate.

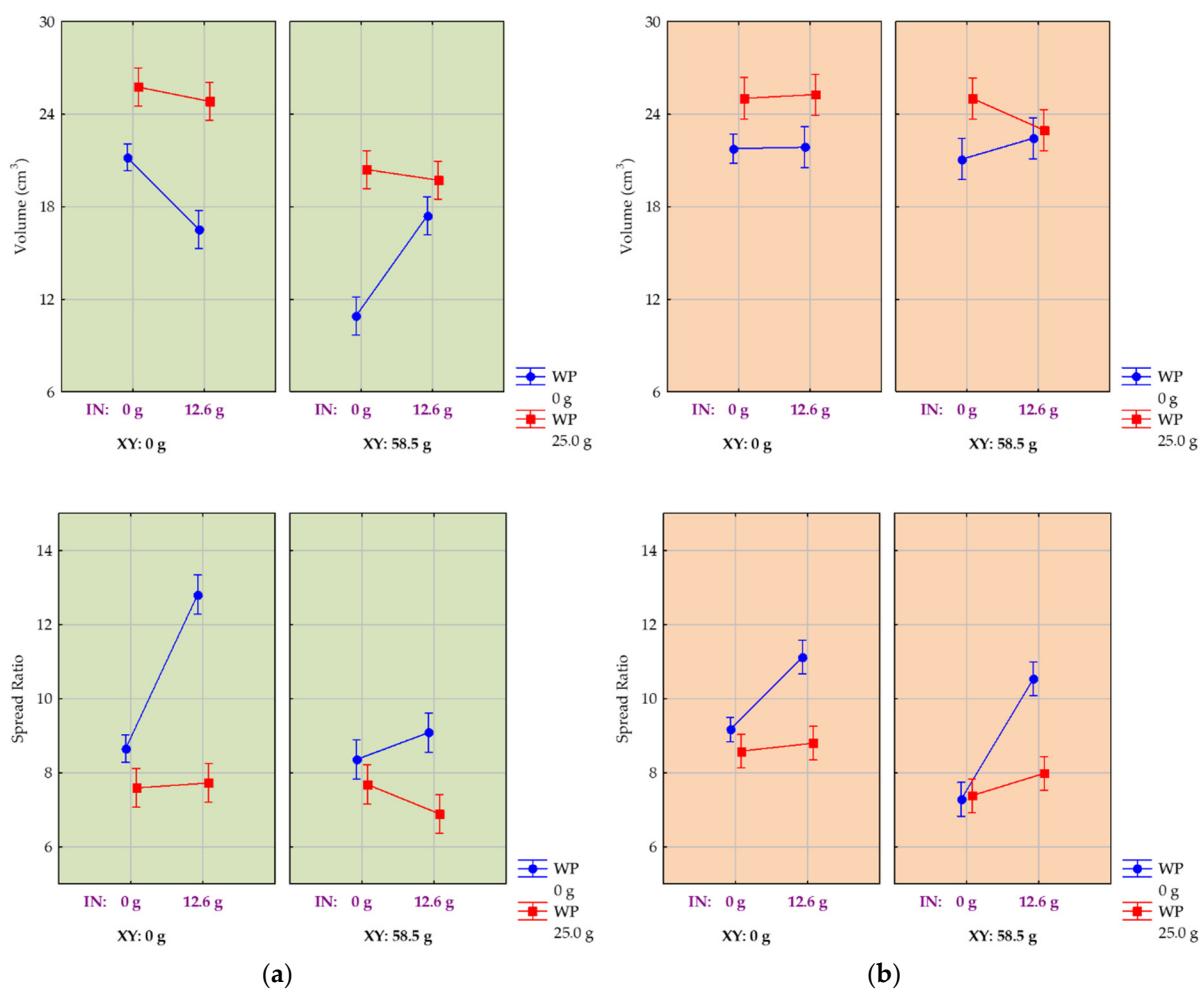

**Figure S2.** Interaction plots for the volume and spread ratio of (a) green-lentil- and (b) red-lentil-based cookies. Data markers represent means. Vertical bars denote 95% confidence intervals (n=12). XY: xylitol, IN: inulin, WP: whey protein isolate.

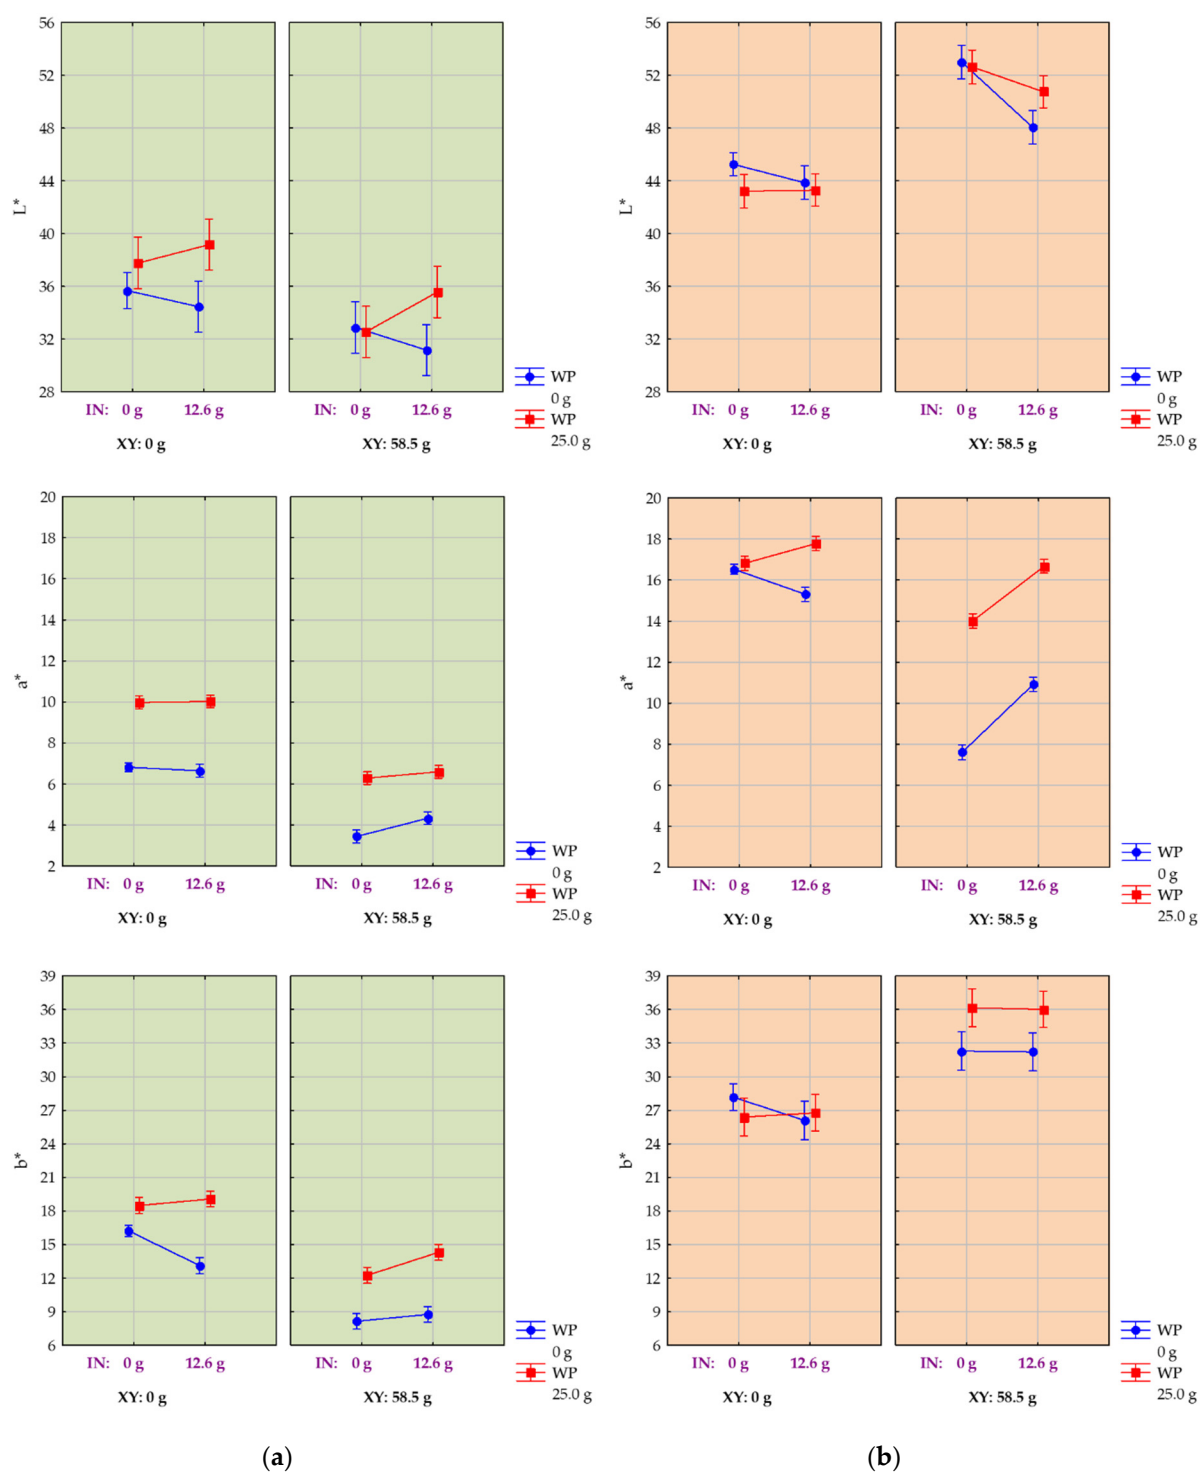

**Figure S3.** Interaction plots for the color parameters of (a) green-lentil- and (b) red-lentil-based cookies. Data markers represent means. Vertical bars denote 95% confidence intervals (n=12). XY: xylitol, IN: inulin, WP: whey protein isolate.

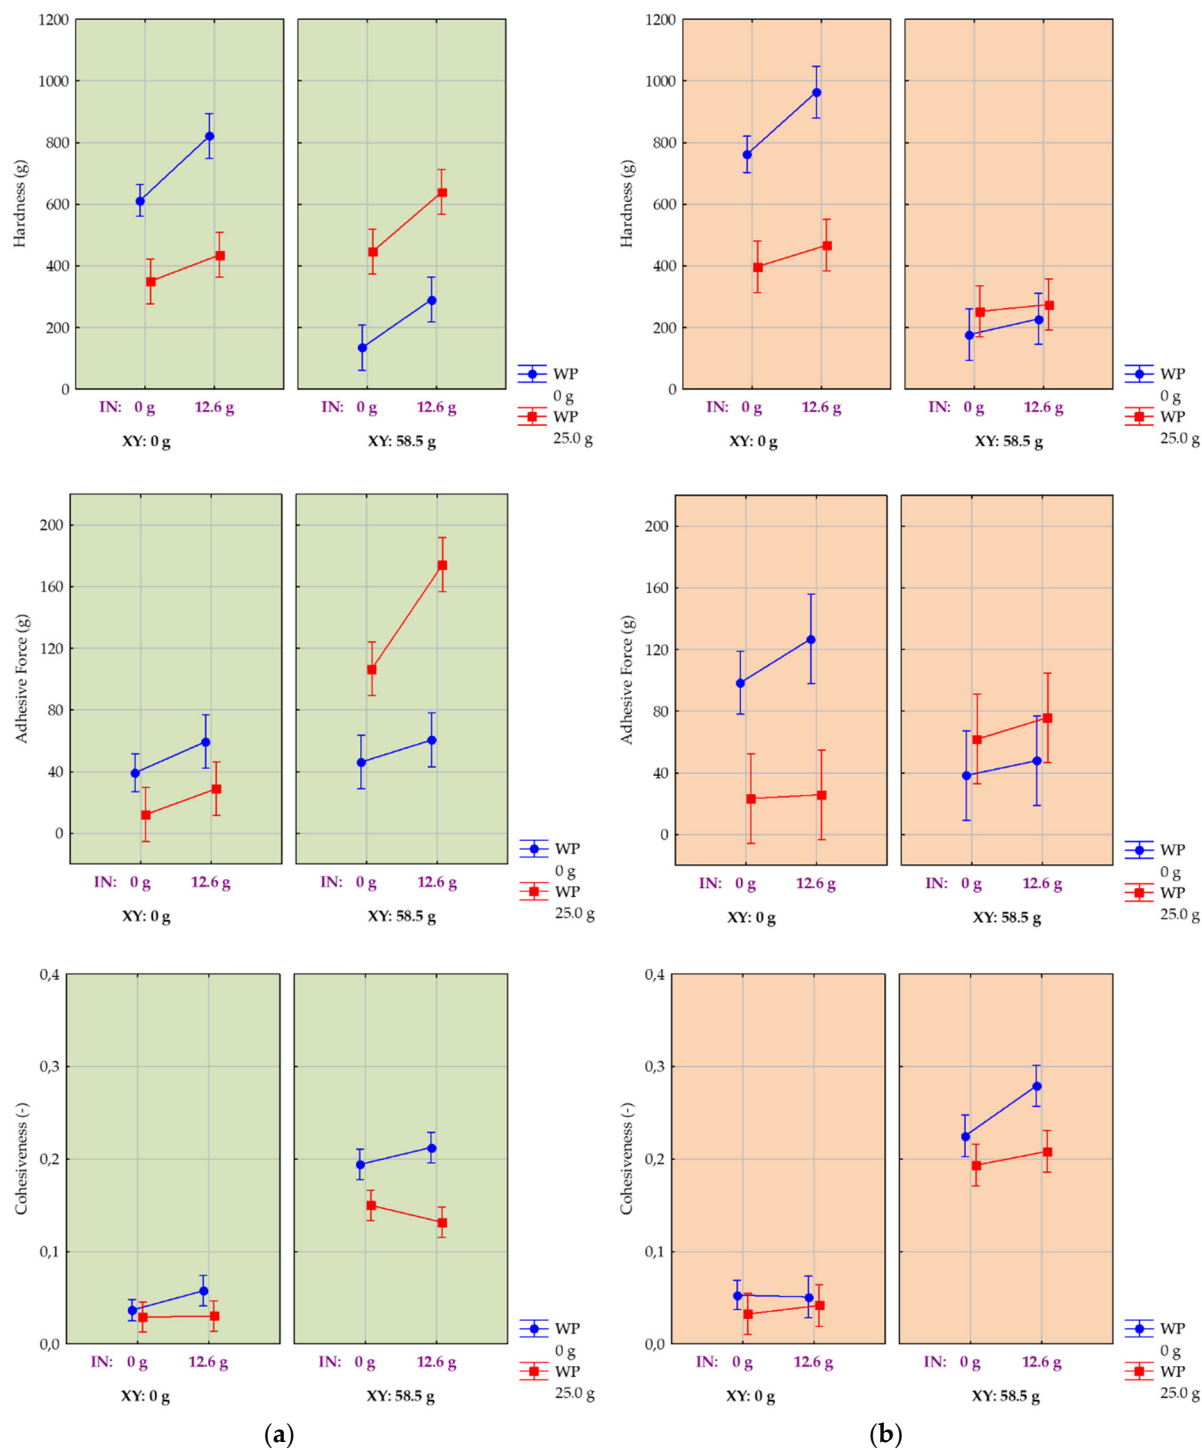

**Figure S4.** Interaction plots for the textural properties of (a) green-lentil- and (b) red-lentil-based cookies. Data markers represent means. Vertical bars denote 95% confidence intervals (n=12). XY: xylitol, IN: inulin, WP: whey protein isolate.

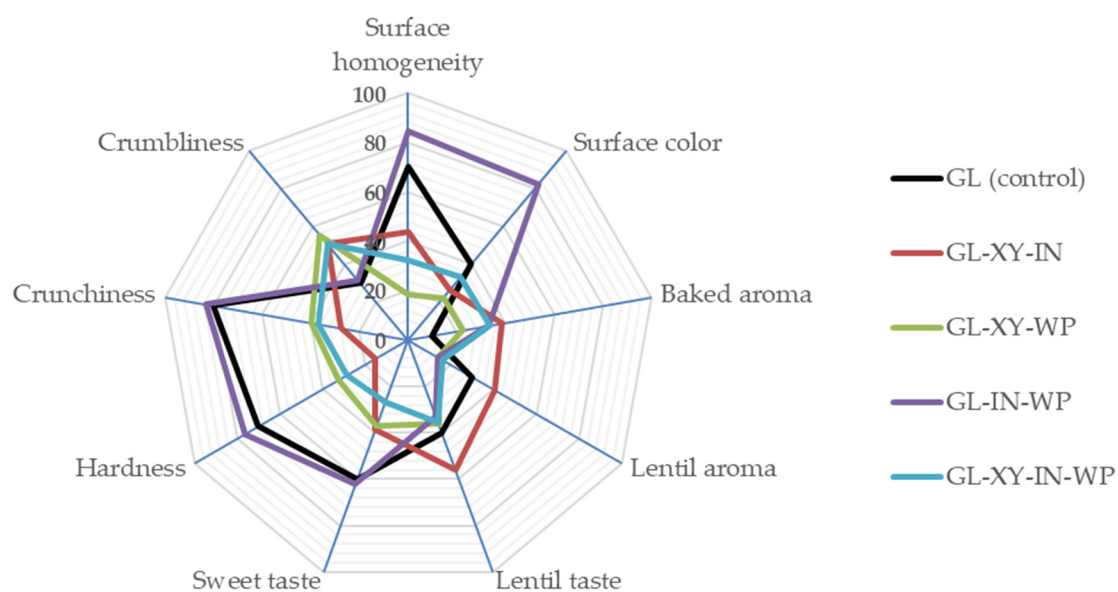

**Figure S5.** Sensory profile of green-lentil-based cookies. The values are the average from thirteen panelists. GL: green lentil, XY: xylitol, IN: inulin, WP: whey protein isolate.

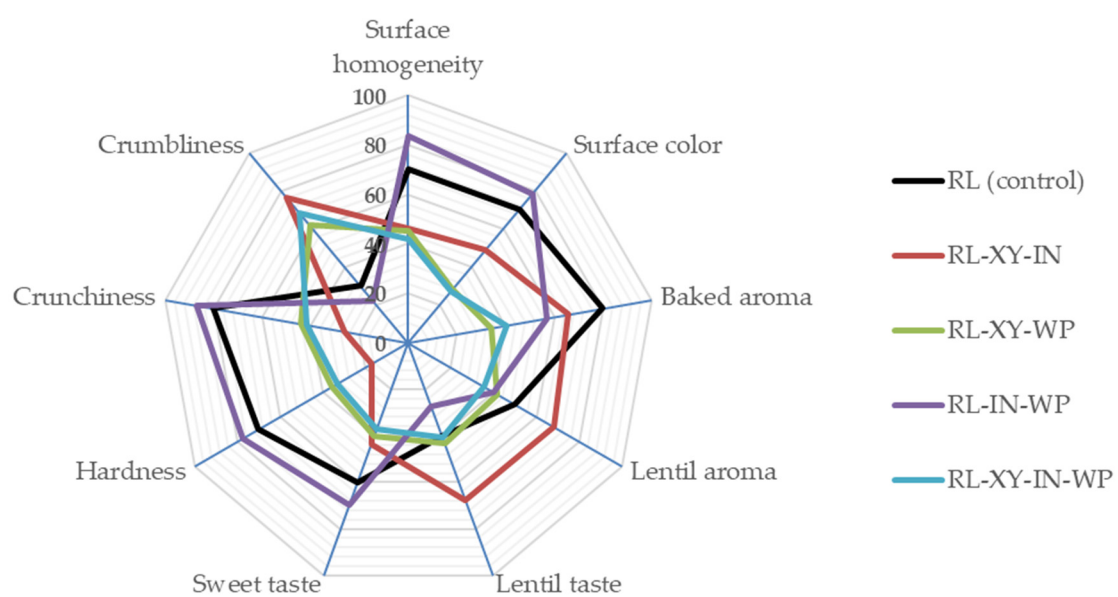

**Figure S6.** Sensory profile of red-lentil-based cookies. The values are the average from sixteen panelists. RL: red lentil, XY: xylitol, IN: inulin, WP: whey protein isolate.
